# Supplementary material
Source: publisher figshare collection journal article supplement (https://karger.figshare.com/ndownloader/files/30610305)
Supplement: Supplementary file 1 [file 30610305]

**Supplementary Table 1.** Background characteristics of the OIT group and comparisons between the OIT, tolerance, and persistent HEA groups

|  | | OIT Group (n=30) | p value † | p value¶ |
| --- | --- | --- | --- | --- |
| Male (n) | | 21 (70%) | >0.999 | >0.999 |
| Term delivery (n) | | 28 (93%) | 0.989 | >0.999 |
| Caesarian section (n) | | 4 (13%) | >0.999 | >0.999 |
| Total breastfeeding (n) | | 8 (27%) | >0.999 | >0.999 |
| Secondhand smoking (n) | | 13 (43%) | >0.999 | 0.755 |
| Parental history of allergic diseases (n) ‡ | | 27 (90%) | >0.999 | >0.999 |
| Age of first visit (years) | | 1.6 (0.7 - 3.0) | 0.058 | 0.689 |
| Age of first OFC (years) | | 5.0 (3.2 - 6.3) | >0.999 | 0.714 |
| Number of food allergens at age 6 (n) | | 2 (1 - 3) | >0.999 | 0.099 |
| Comorbid diseases | Bronchial asthma (n) | 20 (68%) | >0.999 | >0.999 |
| Atopic dermatitis (n) | 30 (100%) | 0.895 | >0.999 |
| Allergic rhinitis (n) | 7 (23%) | >0.999 | >0.999 |
| Allergic conjunctivitis (n) | 4 (13%) | >0.999 | >0.999 |
| History of anaphylaxis to HE (n) | | 19 (63%) | 0.002 | 0.324 |
| Passed heated egg yolk OFC by age 6 | | 11 (37%) | >0.999 | 0.259 |
| Total IgE value (IU/mL) | | 1080 (576 - 1670) | >0.999 | >0.999 |
| Egg white-specific IgE value (kUA/L) | | 29.1 (17.0 - 36.0) | 0.025 | 0.875 |
| Ovomucoid-specific IgE value (kUA/L) | | 18.1 (9.2 - 35.7) | 0.002 | >0.999 |

Categorical variables are presented as number (%) and tested using Fisher's exact test. Continuous variables are presented as median (interquartile range) and tested using Mann-Whitney's U test. †p values were compared between OIT vs. tolerance groups adjusted with Bonferroni correction; ¶ p values were compared between OIT vs. persistent HEA groups and adjusted with Bonferroni correction; ‡ one or both parents have at least one of the following: food allergy, bronchial asthma, atopic dermatitis, allergic rhinitis, or allergic conjunctivitis. OIT, oral immunotherapy; HEA, hen’s egg allergy; OFC, oral food challenge; HE, hen's egg.
